# Supplementary material for: Air-stable, high-conduction solid electrolytes of arsenic-substituted Li4SnS4
Source: Royal Society of Chemistry journal article supplement (doi:10.1039/c3ee43357a), 2013-12-16
Supplement: c3ee43357a.pdf [file c3ee43357a.pdf]

Cite this: DOI: 10.1039/c0xx00000x

ARTICLE TYPE

www.rsc.org/xxxxxx

**Air-Stable, High-Conduction Solid Electrolytes of Arsenic-Substituted  $\text{Li}_4\text{SnS}_4$**

Gayatri Sahu,<sup>1</sup> Zhan Lin,<sup>2</sup> Juchuan Li,<sup>2</sup> Zengcai Liu,<sup>1</sup> Nancy Dudney,<sup>2</sup> and Chengdu Liang<sup>1\*</sup>

Received (in XXX, XXX) Xth XXXXXXXXXX 20XX, Accepted Xth XXXXXXXXXX 20XX

DOI: 10.1039/b000000x

5 **Supporting Information**

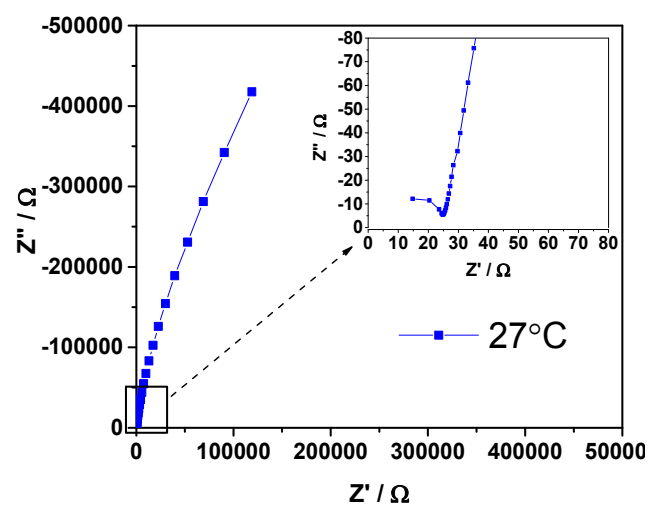

Fig. S1. Impedance spectrum of  $\text{Li}_{3.833}\text{Sn}_{0.833}\text{As}_{0.166}\text{S}_4$  measured at room temperature. The total conductivity is determined by using the intercept between the semi-arc and straight line as the total resistance.

Powder XRD pattern of  $\text{Li}_4\text{SnS}_4$  and  $\text{Li}_3\text{AsS}_4$  with a molar ratio of 1:2 synthesized at identical conditions of the  $\text{Li}_{3.833}\text{Sn}_{0.833}\text{As}_{0.166}\text{S}_4$  phase.

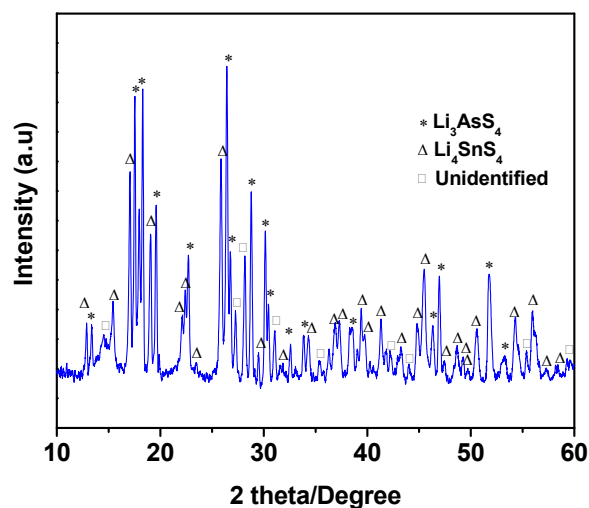

Fig. S2 Powder XRD pattern of As-substituted  $\text{Li}_4\text{SnS}_4$  with a nominal composition of  $\text{Li}_{10}\text{SnAs}_2\text{S}_{12}$  synthesized at identical conditions of  $\text{Li}_{3.833}\text{Sn}_{0.833}\text{As}_{0.166}\text{S}_4$

10

15

20

25

30

35

40

**Table S1** Comparison of activation energy of various solid electrolytes

| Solid Electrolytes                                                        | Activation Energies $E_a$ (eV) | References          |
|---------------------------------------------------------------------------|--------------------------------|---------------------|
| $\text{Li}_{10}\text{GeP}_2\text{S}_{12}$ (LGPS)                          | 0.24                           | [9]                 |
| Nanoporous $\beta\text{-Li}_3\text{PS}_4$ ( $\beta\text{-LPS}$ )          | 0.35                           | [16]                |
| Bulk $\beta\text{-Li}_3\text{PS}_4$                                       | 0.47                           | [23]                |
| Hot pressed cubic $\text{Li}_7\text{La}_3\text{Zr}_2\text{O}_{12}$ (LLZO) | 0.26                           | [24]                |
| $\text{Li}_{3.838}\text{Sn}_{0.833}\text{As}_{0.166}\text{S}_4$           | 0.21                           | Our new electrolyte |

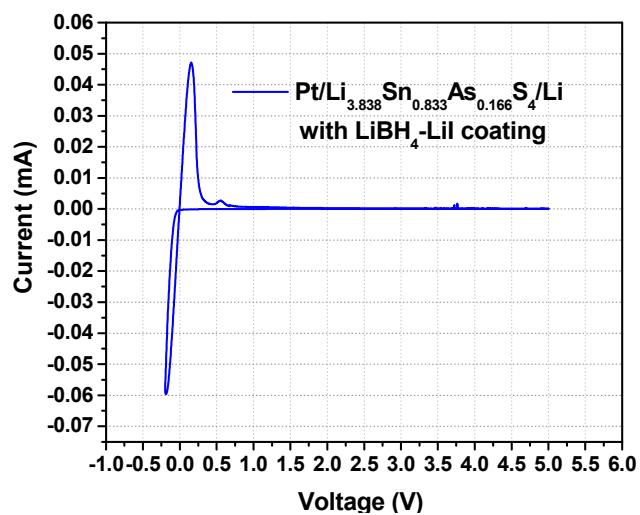

**Fig. S3.** Cyclic voltammogram of a  $\text{Pt}/\text{Li}_{3.838}\text{Sn}_{0.833}\text{As}_{0.166}\text{S}_4/\text{Li}$  cell with  $\text{LiBH}_4\text{-LiI}$  passivation layer at  $1 \text{ mVs}^{-1}$  showing plating and stripping of Li between  $-0.5$  and  $5.0\text{V}$ .

5

35

10

15

20

25

30
